# Supplementary material for: Clinical manifestations of reported Lyme disease cases in Ontario, Canada: 2005–2014
Source: PubMed Central journal article supplement (PMC5983483; doi:10.1371/journal.pone.0198509), 2018-06-01
Supplement: pone.0198509.s001.pdf [file pone.0198509.s001.pdf]

1 **S1. Appendix** Ontario Lyme disease case definitions: 2005–14.

2 **2005–2008**

3 **Confirmed case**

4 **Endemic**

5 (a) Isolation of *Borrelia burgdorferi* from a clinical specimen **OR**

6 (b) Erythema migrans observed by a physician **OR**

7 (c) At least one clinically compatible late manifestation (neurologic, cardiac or musculoskeletal) **AND**

8 laboratory evidence of *B. burgdorferi* infection

9 **Non-endemic**

10 (d) Erythema migrans observed by a physician and laboratory evidence of *B. burgdorferi* infection

11 **Probable Case**

12 **Endemic**

13 (a) Physician recognition of erythema migrans as reported by patient

14 **Non-endemic**

15 (b) Compatible late manifestation (neurologic, cardiac or musculoskeletal) **AND** laboratory

16 evidence for *B. burgdorferi* infection

17

18 **2009–2014**

19 **Confirmed case**

20 (a) Erythema migrans (EM) with laboratory confirmation by polymerase chain reaction (PCR) or culture

21 **OR**

22 (b) EM with laboratory support by serological methods, and a history of residence in, or visit to, an

23 endemic area **OR**

24 (c) Objective symptoms of disseminated Lyme disease with laboratory confirmation by PCR or culture

25 **OR**

26 (d) Objective symptoms of disseminated Lyme disease with laboratory support by serological methods,

27 **AND** a history of residence in, or visit to, an endemic area

28 **Probable case**

29 (a) EM with laboratory support by serological methods but with no history of residence in, or visit to, an

30 endemic area **OR**

31 (b) Objective symptoms of disseminated Lyme disease with laboratory support by serological methods,

32 but with no history of residence in, or visit to an endemic area **OR**

33 (c) EM without laboratory confirmation, but with history of residence in, or visit to, an endemic area.
