# Supplementary material for: Clinical manifestations of reported Lyme disease cases in Ontario, Canada: 2005–2014
Source: PubMed Central journal article supplement (PMC5983483; doi:10.1371/journal.pone.0198509), 2018-06-01
Supplement: pone.0198509.s002.pdf [file pone.0198509.s002.pdf]

- 1 **S1 Table.** Reported symptoms for Lyme disease cases grouped by syndrome and stage, Ontario: 2005–
- 2 14 (n = 1,133).\*

| Reported symptoms              |                                              | Number of cases |
|--------------------------------|----------------------------------------------|-----------------|
| <b>Early localized disease</b> |                                              |                 |
| EM, classic                    | Erythema migrans [EM]                        | 640             |
|                                | Rash, "bull's eye" / EM $\geq$ 5 cm diameter | 14              |
|                                | Erythema                                     | 4               |
| EM, atypical                   | Swelling, localized                          | 22              |
|                                | Rash, other                                  | 14              |
|                                | Cellulitis                                   | 7               |
|                                | Rash, not described                          | 6               |
|                                | Rash, itchy                                  | 5               |
|                                | Rash, macular                                | 4               |
|                                | Rash, maculopapular                          | 4               |
|                                | Rash on body, desquamation not present       | 2               |
|                                | Rash, papular                                | 2               |
|                                | Rash                                         | 1               |
|                                | Rash, centrifugal distribution               | 1               |
|                                | Rash, rose spots                             | 1               |
| Flu-like symptoms              | Fatigue                                      | 600             |
|                                | Headache                                     | 496             |
|                                | Fever                                        | 484             |
|                                | Myalgia [muscle pain]                        | 426             |
|                                | Chills                                       | 57              |
|                                | Sweating, at night                           | 14              |
|                                | Sweating                                     | 13              |
|                                | Back pain                                    | 12              |
|                                | Weak                                         | 11              |
|                                | Body, generalized aches                      | 7               |
|                                | Malaise [general unwell feeling]             | 7               |
|                                | Lethargy                                     | 6               |
|                                | Muscle weakness                              | 4               |
|                                | Back ache                                    | 2               |
|                                | Cervical lymphadenopathy                     | 1               |
| Fever, cycling                 | 1                                            |                 |

|                                   |                                                       |     |
|-----------------------------------|-------------------------------------------------------|-----|
|                                   | Sweating, profuse [diaphoresis]                       | 1   |
| <b>Early disseminated disease</b> |                                                       |     |
| Bell's Palsy                      | Bell's palsy / other cranial neuritis                 | 79  |
|                                   | Facial paralysis [bell's palsy]                       | 2   |
| Other neurological symptoms       | Neck pain                                             | 260 |
|                                   | Paresthesia [tingling, numbness or burning]           | 135 |
|                                   | Cognitive impairment or mood disturbances             | 87  |
|                                   | Visual symptoms                                       | 78  |
|                                   | Auditory symptoms                                     | 32  |
|                                   | Dizziness                                             | 27  |
|                                   | Lymphocytic meningitis/encephalitis/encephalomyelitis | 13  |
|                                   | Radiculoneuropathy                                    | 11  |
|                                   | Neck, stiff                                           | 8   |
|                                   | Insomnia                                              | 4   |
|                                   | Photophobia                                           | 4   |
|                                   | Memory loss                                           | 3   |
|                                   | Vision, blurred/double                                | 3   |
|                                   | Muscle paralysis                                      | 2   |
|                                   | Neurological deficits                                 | 2   |
|                                   | Seizures                                              | 2   |
|                                   | Sore throat/hoarseness/difficulty swallowing          | 2   |
|                                   | Swallowing difficulty [dysphagia]                     | 2   |
|                                   | Agitation or restlessness                             | 1   |
|                                   | Altered mental status                                 | 1   |
|                                   | Confusion                                             | 1   |
|                                   | Convulsions                                           | 1   |
|                                   | Hearing impairment                                    | 1   |
|                                   | Hearing loss                                          | 1   |
|                                   | Irritability                                          | 1   |
|                                   | Meningitis                                            | 1   |
|                                   | Mouth/tongue, tingling/burning sensations             | 1   |
|                                   | Neurological involvement                              | 1   |
|                                   | Neurological symptoms                                 | 1   |
|                                   | Paralysis, partial [paresis]                          | 1   |
|                                   | Swallowing pain                                       | 1   |
|                                   | Confusion/forgetful                                   | 0   |
| Cardiac symptoms                  | Palpitations / arrhythmia                             | 49  |
|                                   | Chest pain                                            | 6   |
|                                   | A-V heart block [second or third degree]              | 5   |
|                                   | Shortness of breath                                   | 3   |
|                                   | Heart flutter [palpitations]                          | 1   |
|                                   | Heart involvement                                     | 1   |
|                                   | Heart rate increase [tachycardia]                     | 1   |

| Late disseminated disease                          |                                                   |     |
|----------------------------------------------------|---------------------------------------------------|-----|
| Lyme arthritis                                     | Arthralgia [joint pain]                           | 440 |
|                                                    | Joint inflammation [arthritis]                    | 2   |
|                                                    | Joint inflammation, reactive [reactive arthritis] | 1   |
|                                                    | Limb pain                                         | 1   |
| Symptoms not related to Lyme disease               |                                                   |     |
| Symptoms not consistent with the defined LD stages | Vomiting                                          | 17  |
|                                                    | Anorexia [loss of appetite]                       | 14  |
|                                                    | Abdominal pain                                    | 6   |
|                                                    | Jaw pain                                          | 6   |
|                                                    | Cough                                             | 5   |
|                                                    | Coryza [runny nose]                               | 4   |
|                                                    | Dehydration                                       | 3   |
|                                                    | Eye, pain                                         | 3   |
|                                                    | Nausea [in children]                              | 3   |
|                                                    | Rash, painful                                     | 3   |
|                                                    | Abdominal bloating or flatulence                  | 2   |
|                                                    | Breathing stops/suspends [apnea]                  | 2   |
|                                                    | Constipation                                      | 2   |
|                                                    | Liver function abnormality                        | 2   |
|                                                    | Loss of weight                                    | 2   |
|                                                    | Nausea                                            | 2   |
|                                                    | Throat, sore                                      | 2   |
|                                                    | Urine, dark                                       | 2   |
|                                                    | Abscesses, external                               | 1   |
|                                                    | Cough, dry                                        | 1   |
|                                                    | Coughing with apnea/vomiting                      | 1   |
|                                                    | Cough, not productive                             | 1   |
|                                                    | Enlarged liver and spleen [hepatosplenomegaly]    | 1   |
|                                                    | Eyelid swelling [periorbital edema]               | 1   |
|                                                    | GI symptoms, general                              | 1   |
|                                                    | Hair loss [alopecia]                              | 1   |
|                                                    | Infection, localized                              | 1   |
|                                                    | Joint inflammation, septic [septic arthritis]     | 1   |
|                                                    | Palms/hands, redness [palmar erythema]            | 1   |
|                                                    | Rash, petechiae                                   | 1   |
|                                                    | Septicemia                                        | 1   |
|                                                    | Skin, itchy                                       | 1   |
|                                                    | Skin/wound redness, increasing quickly            | 1   |
|                                                    | Tonsillitis                                       | 1   |
| Tonsillitis, exudative                             | 1                                                 |     |
| Lymphadenopathy                                    | 59                                                |     |
| Diarrhea                                           | 4                                                 |     |
| Cramps                                             | 2                                                 |     |

|  |                                         |   |
|--|-----------------------------------------|---|
|  | Fainting                                | 1 |
|  | Leukopenia [low white blood cell count] | 1 |
|  | Muscle spasms                           | 1 |
|  | Other [specify]                         | 1 |
|  | Skin/muscle, extreme pain to touch      | 1 |

3 \*Includes all cases that reported  $\geq 1$  symptom.

4
